# Supplementary material
Source: Springer Nature journal article supplement (https://www.springermedizin.de/resource/supplementary/12889_2011_3979_MOESM4_ESM.pdf/9490906)

% of periods

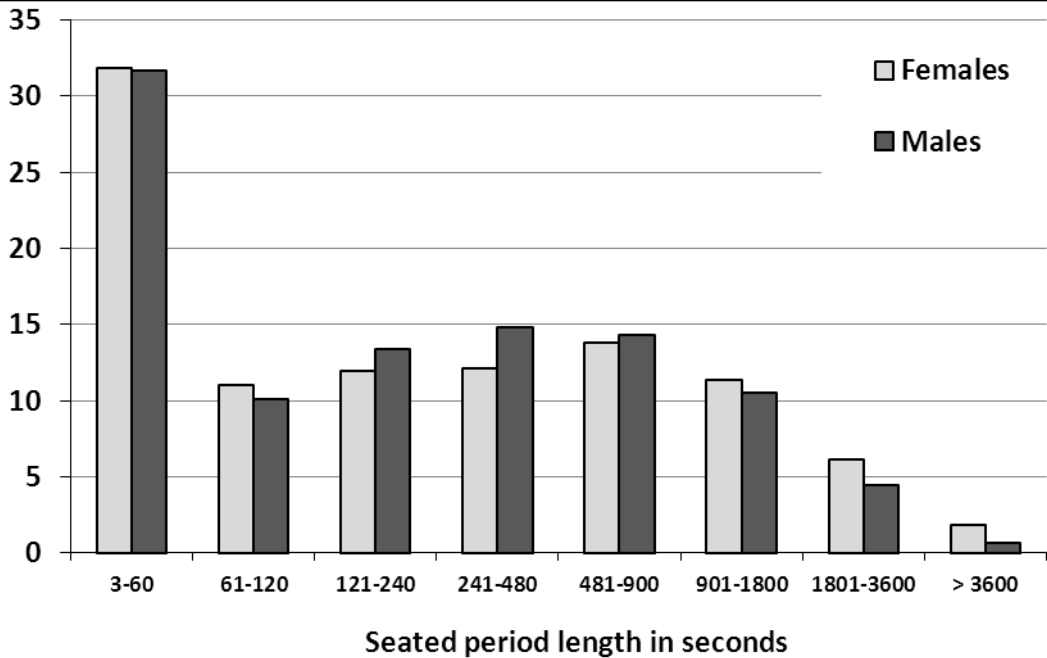

Supplement: MOESM4 [file 9490906]
